# Supplementary material
Source: PubMed Central journal article supplement (PMC1890349)

## SUPPLEMENTAL MATERIAL

### Supplemental text

#### How to derive the relationship between $\tau_o$ and $\tau_{o, obs}$ ?

If the pdf (probability density function) of the closed times is a single-exponential pdf represented by the equation:  $f(t)=(1/\tau_{c1})\cdot\exp(-t/\tau_{c1})$ , the fraction of all closed events shorter than the filter dead time ( $t_d$ ) is  $P(t\leq t_d) = 1-\exp(-t_d/\tau_{c1})$ . Since >95% of all closed events belongs to the first component, we can make the approximation  $P(t\leq t_d) \approx 1-\exp(-t_d/\tau_{c1})$  even for our 4-exponential closed-time distribution. This fraction of closed events will not be detected; we will only detect the fraction of events longer than the filter dead time, given by  $P(t>t_d) = \exp(-t_d/\tau_{c1})$ . Therefore, our apparent overall closing rate ( $koc_{obs}$ ) will be slower than the real overall closing rate  $koc_{real}$  ( $= ko1+ko2$ ). The relationship is  $koc_{obs} = koc_{real}\cdot P(t>t_d)$ , because  $koc$  is proportional to the number of closures and we can only detect a fraction  $P(t>t_d)$  of all closures. Therefore,  $koc_{obs} = koc_{real}\cdot\exp(-t_d/\tau_{c1})$ . Because  $\tau_{o,obs} = 1/koc_{obs}$  and  $\tau_{o,real}=1/koc_{real}$ , we can write  $\tau_{o,real} = \tau_{o,obs} \cdot \exp(-t_d/\tau_{c1})$ . In our article  $\tau_o$  stands for  $\tau_{o,real}$ .

### Figure legends

#### Figure S1. Bar charts comparing various selected single-channel parameters for the SUR and TMD0 channels obtained at -40 mV.

Statistical significance was calculated using an unpaired Student *t*-test and significant differences were found for the pairs of parameters marked by brackets (\*\* for  $p<0.05$ ).

#### Figure S2. Bar charts comparing various selected single-channel parameters for the SUR and TMD0 channels obtained at -100 mV.

Statistical significance was calculated using an unpaired Student *t*-test and significant differences were found for the pairs of parameters marked by brackets (\*\* for  $p<0.05$ ).

#### Figure S3. No detectable voltage dependence of ATP inhibition.

A. Time course of a macroscopic current in response to different ATP concentrations at two membrane potentials. Current was recorded from a macropatch expressing SUR2A/Kir6.2 $\Delta$ 26 in the inside-out configuration. The same patch was exposed to a series of [ATP] (*bars*) both at -100 and at -40 mV. B. ATP dose response curves at -100 and -40 mV are superimposable. There is no difference in the IC50 or the Hill coefficients obtained at the two membrane potentials.

# TABLE S1

## Number of SUR/Kir6.2 $\Delta$ 26 recordings whose closed times were best fitted with 3-5 exponentials\*

|         |         | $n_3$    | $n_4$    | $n_5$    | Total |
|---------|---------|----------|----------|----------|-------|
| SUR1    | -40 mV  | 2 (17%)  | 4 (33%)  | 6 (50%)  | 12    |
|         | -100 mV | 1 (8%)   | 5 (38%)  | 7 (54%)  | 13    |
| SUR2A   | -40 mV  | 4 (50%)  | 3 (38%)  | 1 (12%)  | 8     |
|         | -100 mV | 4 (31%)  | 8 (61%)  | 1 (8%)   | 13    |
| Overall |         | 11 (24%) | 20 (43%) | 15 (33%) | 46    |

\* $n_i$  denotes the number of recordings that could be best fitted with  $i$  exponentials. The percentages of  $n_i$  are in parentheses.

**TABLE S2****Single channel parameters for chimera/Kir6.2 $\Delta$ 26 measured at -40 mV\***

|                  | Chimera 1          | Chimera 2          | Chimera 3          | Chimera 4          |
|------------------|--------------------|--------------------|--------------------|--------------------|
| $\gamma$ (pS)    | 63.6 $\pm$ 3.8     | 60.3 $\pm$ 5.6     | 62.3 $\pm$ 2.5     | 65.3 $\pm$ 2.0     |
| Po               | 0.80 $\pm$ 0.04    | 0.86 $\pm$ 0.02    | 0.84 $\pm$ 0.02    | 0.82 $\pm$ 0.03    |
| $\tau_{c1}$ (ms) | 0.23 $\pm$ 0.011   | 0.19 $\pm$ 0.001   | 0.19 $\pm$ 0.006   | 0.20 $\pm$ 0.006   |
| $\tau_{c2}$ (ms) | 2.24 $\pm$ 0.34    | 1.90 $\pm$ 0.26    | 2.42 $\pm$ 0.38    | 2.00 $\pm$ 2.78    |
| $\tau_{c3}$ (ms) | 13.03 $\pm$ 2.12   | 10.77 $\pm$ 0.82   | 17.42 $\pm$ 4.90   | 11.15 $\pm$ 0.88   |
| $\tau_{c4}$ (ms) | 1786 $\pm$ 649     | 2382 $\pm$ 1490    | 1828 $\pm$ 782     | 3918 $\pm$ 2078    |
| $a_{c1}$ (%)     | 98.24 $\pm$ 0.46   | 99.35 $\pm$ 0.07   | 99.09 $\pm$ 0.12   | 99.01 $\pm$ 0.32   |
| $a_{c2}$ (%)     | 1.15 $\pm$ 0.33    | 0.42 $\pm$ 0.06    | 0.58 $\pm$ 0.08    | 0.64 $\pm$ 0.15    |
| $a_{c3}$ (%)     | 0.59 $\pm$ 0.15    | 0.22 $\pm$ 0.04    | 0.32 $\pm$ 0.06    | 0.35 $\pm$ 0.17    |
| $a_{c4}$ (%)     | 0.011 $\pm$ 0.002  | 0.005 $\pm$ 0.001  | 0.010 $\pm$ 0.003  | 0.008 $\pm$ 0.003  |
| $\tau_o$ (ms)    | 1.75 $\pm$ 0.05    | 1.72 $\pm$ 0.14    | 1.69 $\pm$ 0.04    | 1.75 $\pm$ 0.09    |
| $\tau_{ib}$ (ms) | 5.96 $\pm$ 0.91    | 4.89 $\pm$ 0.35    | 4.67 $\pm$ 0.36    | 6.63 $\pm$ 0.96    |
| N                | 70.35 $\pm$ 20.46  | 160.51 $\pm$ 21.00 | 124.23 $\pm$ 20.24 | 124.63 $\pm$ 26.48 |
| $\tau_b$ (ms)    | 140.37 $\pm$ 40.45 | 307.56 $\pm$ 48.47 | 234.55 $\pm$ 37.34 | 251.32 $\pm$ 58.43 |
| n                | 4                  | 4                  | 4                  | 7                  |

\*  $\tau_{ci}$ ,  $a_{ci}$ ,  $\tau_b$ ,  $\tau_{ib}$ ,  $\tau_o$  and N are defined in the Methods section;  $\gamma$  – single-channel conductance; Po – open probability; n – number of recordings used for the analyses; values are given in mean  $\pm$  SEM

**TABLE S3**
**Rate constants for studied channels (+ Kir6.2 $\Delta$ 26)\***

|                   | $k_{43}$                | $k_{34}$                | $k_{32}$                   | $k_{23}$                   | $k_{20}$                   | $k_{O2}$                 | $k_{O1}$                   | $k_{10}$                 |
|-------------------|-------------------------|-------------------------|----------------------------|----------------------------|----------------------------|--------------------------|----------------------------|--------------------------|
| <b>SUR1</b>       | <b><i>1.8 ± 0.6</i></b> | <b><i>4.0 ± 0.8</i></b> | <b><i>120.9 ± 7.6</i></b>  | <b><i>86.8 ± 15.4</i></b>  | <b><i>331.6 ± 27.2</i></b> | <b><i>13.1 ± 1.9</i></b> | <b><i>611.2 ± 19.9</i></b> | <b><i>5279 ± 99</i></b>  |
|                   | (1.1 ± 0.2)             | (0.6 ± 0.2)             | (74.6 ± 5.5)               | (55.0 ± 10.9)              | (153.3 ± 11.3)             | (29.4 ± 2.6)             | (982.5 ± 25.2)             | (3244 ± 69)              |
| <b>SUR2A</b>      | <b><i>4.2 ± 2.0</i></b> | <b><i>8.5 ± 4.0</i></b> | <b><i>135.3 ± 21.2</i></b> | <b><i>74.2 ± 8.9</i></b>   | <b><i>372.6 ± 41.0</i></b> | <b><i>2.6 ± 0.4</i></b>  | <b><i>630.6 ± 31.3</i></b> | <b><i>5452 ± 236</i></b> |
|                   | (1.2 ± 0.4)             | (1.2 ± 0.5)             | (90.7 ± 12.3)              | (46.0 ± 11.7)              | (127.2 ± 7.6)              | (21.0 ± 2.4)             | (1040 ± 22.8)              | (3572 ± 89)              |
| <b>S1-TMD0</b>    | <b><i>1.1 ± 0.3</i></b> | <b><i>6.0 ± 1.1</i></b> | <b><i>123.6 ± 13.9</i></b> | <b><i>43.9 ± 4.1</i></b>   | <b><i>595.3 ± 37.2</i></b> | <b><i>43.9 ± 5.4</i></b> | <b><i>643.6 ± 21.3</i></b> | <b><i>5062 ± 126</i></b> |
|                   | (1.1 ± 0.3)             | (0.7 ± 0.2)             | (75.6 ± 3.9)               | (158.3 ± 22.4)             | (443.3 ± 43.2)             | (55.5 ± 3.6)             | (878.1 ± 23.8)             | (3342 ± 96)              |
| <b>S2-TMD0</b>    | <b><i>1.5 ± 0.5</i></b> | <b><i>5.2 ± 0.8</i></b> | <b><i>143.4 ± 12.1</i></b> | <b><i>71.3 ± 11.7</i></b>  | <b><i>477.9 ± 31.5</i></b> | <b><i>40.8 ± 3.6</i></b> | <b><i>620.4 ± 23.6</i></b> | <b><i>5184 ± 88</i></b>  |
|                   | (0.9 ± 0.2)             | (1.0 ± 0.2)             | (99.4 ± 6.47)              | (133.7 ± 11.7)             | (388.7 ± 32.0)             | (58.5 ± 4.6)             | (987.6 ± 28.5)             | (3427 ± 74)              |
| <b>Chimera 1</b>  | <b><i>1.6 ± 1.0</i></b> | <b><i>3.7 ± 2.1</i></b> | <b><i>131.0 ± 33.5</i></b> | <b><i>115.2 ± 21.3</i></b> | <b><i>321.5 ± 29.8</i></b> | <b><i>9.0 ± 2.3</i></b>  | <b><i>537.9 ± 26.0</i></b> | <b><i>4495 ± 191</i></b> |
| <b>Chimera 2</b>  | <b><i>1.0 ± 0.3</i></b> | <b><i>3.8 ± 0.9</i></b> | <b><i>121.8 ± 20.4</i></b> | <b><i>109.5 ± 27.8</i></b> | <b><i>354.0 ± 46.3</i></b> | <b><i>3.2 ± 0.4</i></b>  | <b><i>555.5 ± 49.6</i></b> | <b><i>5398 ± 44</i></b>  |
| <b>Chimera 3</b>  | <b><i>1.4 ± 0.4</i></b> | <b><i>4.6 ± 0.9</i></b> | <b><i>102.5 ± 19.2</i></b> | <b><i>78.1 ± 7.8</i></b>   | <b><i>274.2 ± 21.9</i></b> | <b><i>4.3 ± 0.5</i></b>  | <b><i>541.4 ± 14.7</i></b> | <b><i>5270 ± 146</i></b> |
| <b>Chimera 4</b>  | <b><i>1.6 ± 1.1</i></b> | <b><i>3.2 ± 0.2</i></b> | <b><i>134.1 ± 24.3</i></b> | <b><i>96.3 ± 17.3</i></b>  | <b><i>324.3 ± 20.2</i></b> | <b><i>5.2 ± 2.1</i></b>  | <b><i>548.6 ± 30.5</i></b> | <b><i>5004 ± 144</i></b> |
| <b>S2-TMD0-L0</b> | <b><i>1.6 ± 0.4</i></b> | <b><i>8.2 ± 1.2</i></b> | <b><i>125.3 ± 9.2</i></b>  | <b><i>66.22 ± 6.4</i></b>  | <b><i>551.5 ± 32.6</i></b> | <b><i>21.8 ± 1.1</i></b> | <b><i>511.7 ± 6.8</i></b>  | <b><i>4669 ± 62</i></b>  |

\* rate constants obtained at -40 mV are bolded and italicized; rate constants obtained at -100 mV are in parentheses; values were given in mean ± SEM

# FIGURE S1

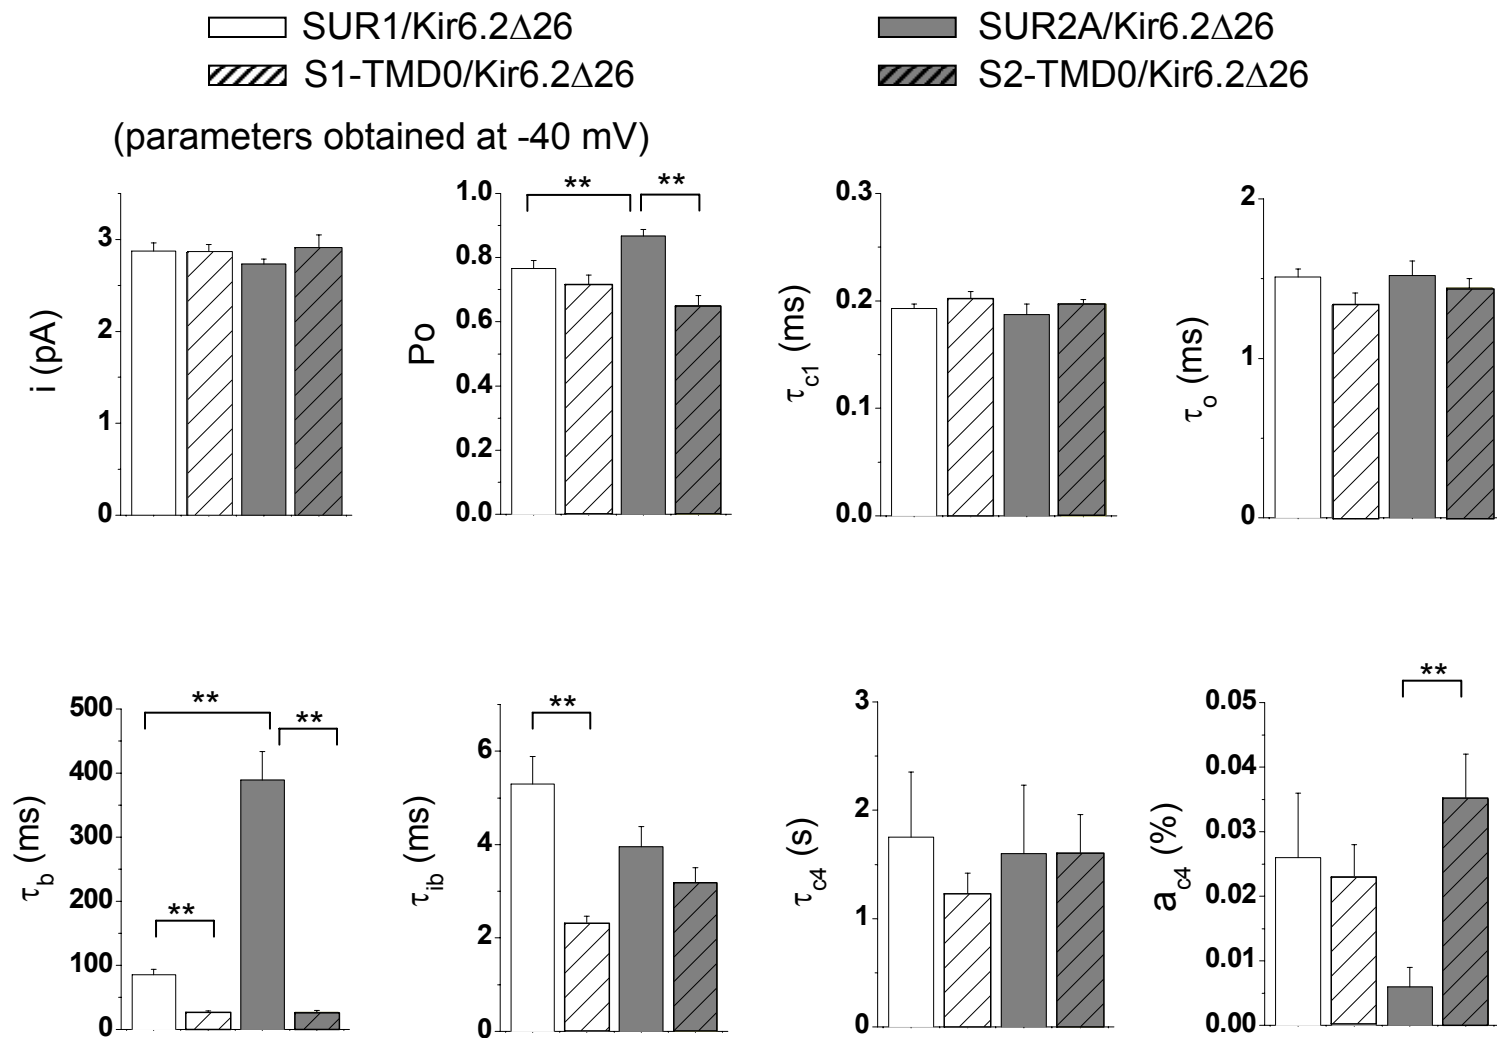

**FIGURE S2**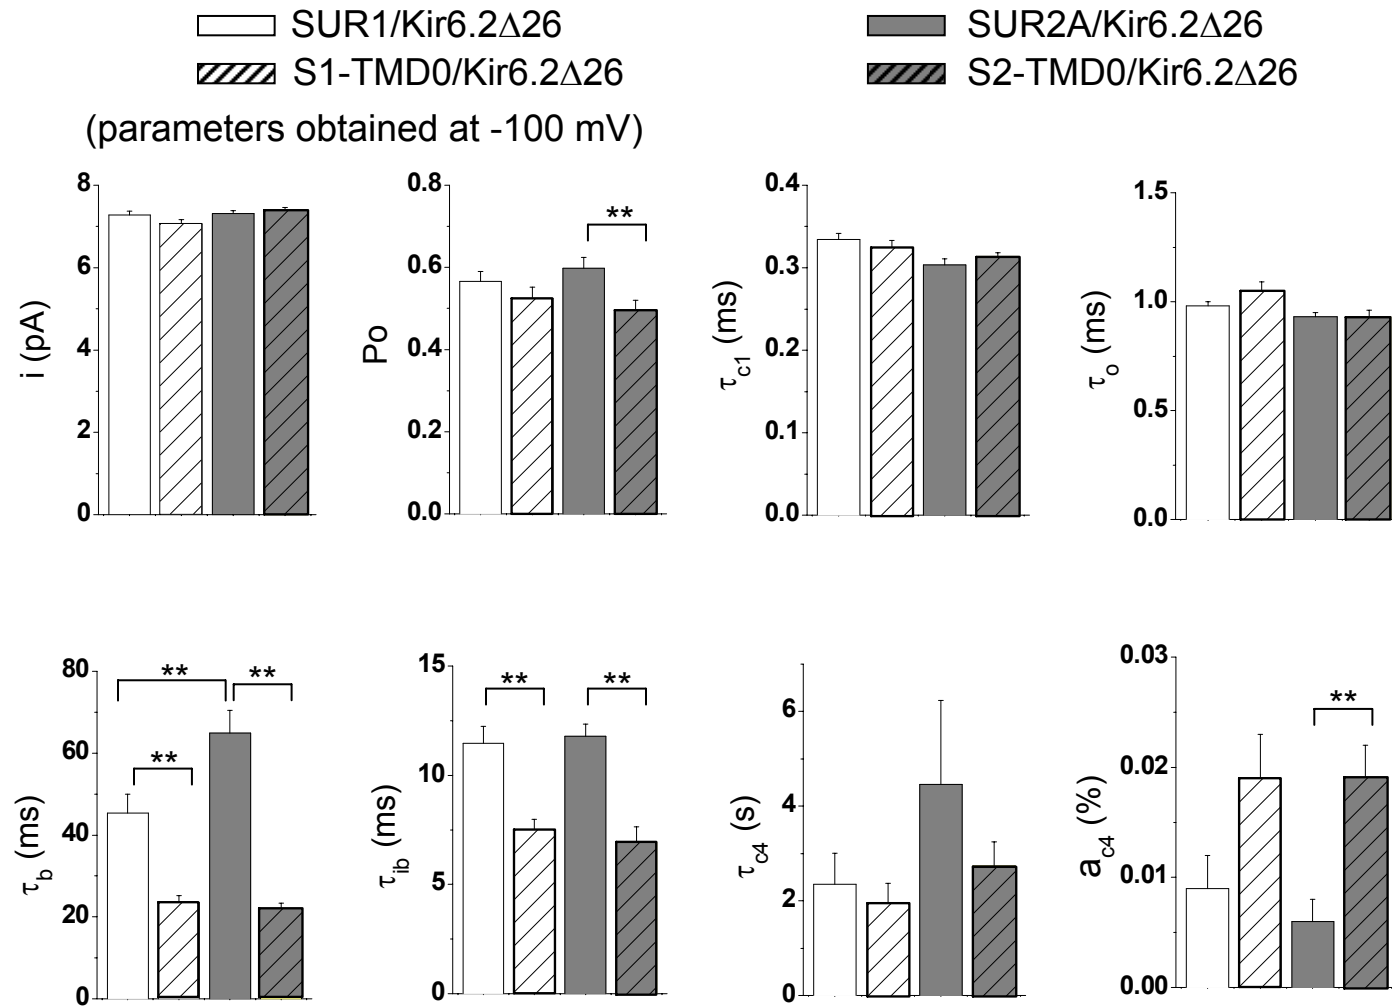

**FIGURE S3**

**A**

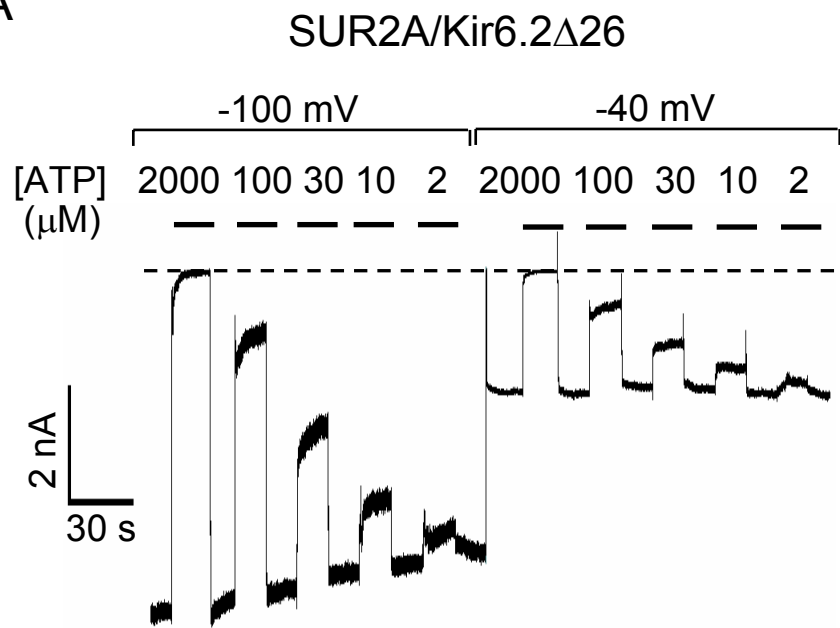

**B**

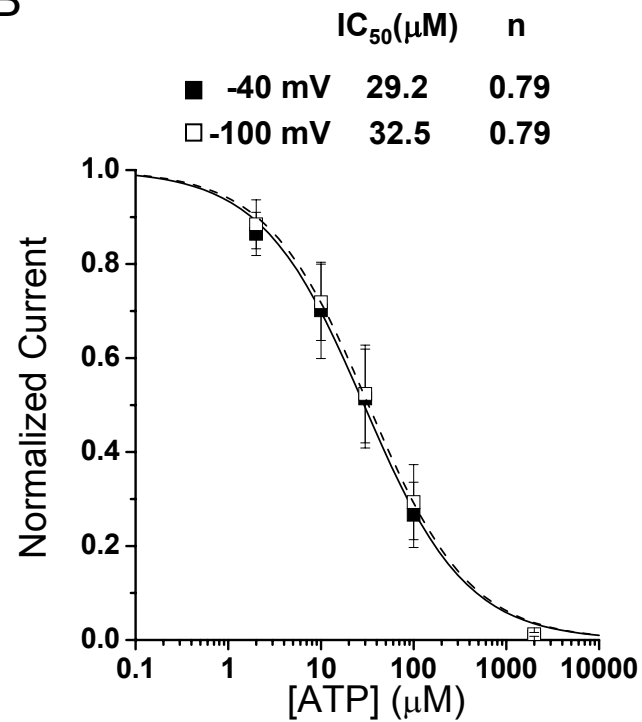

Supplement: jphysiol_2006.112748_1.pdf [file jphysiol_2006.112748_1.pdf]
